# Supplementary material for: Ngfr+ cholinergic projection from SI/nBM to mPFC selectively regulates temporal order recognition memory
Source: PubMed Central journal article supplement — Nat Commun. 2024 Aug 26;15:7342. doi: 10.1038/s41467-024-51707-w (PMC11347598; doi:10.1038/s41467-024-51707-w), 2024-08-26
Supplement: 41467_2024_51707_MOESM3_ESM.pdf [file 41467_2024_51707_MOESM3_ESM.pdf]

## **Description of Additional Supplementary Files**

**Supplementary Movie 1** :- Correlation of ACh release and object encounter in temporal order recognition memory test ACh signals rose right before the mice encountered the object and declined rapidly when they withdrew from exploring the object.
